# Supplementary material for: Assessing the Functional Relevance of Variants in the IKAROS Family Zinc Finger Protein 1 (IKZF1) in a Cohort of Patients With Primary Immunodeficiency
Source: PubMed Central journal article supplement (PMC6477086; doi:10.3389/fimmu.2019.00568), 2019-04-16
Supplement: Table_1.pdf [file Table_1.pdf]

**Table S1. List of oligonucleotides primers used for cloning.**

|           | <b>Name</b>                           | <b>5' to 3' sequence</b>                                                     |
|-----------|---------------------------------------|------------------------------------------------------------------------------|
| <b>1</b>  | <b>IKAROS cloning primer- Forward</b> | GATCAAGCTTCAGCCACCATGGATGCTGATGAGGGTCAAGAC                                   |
| <b>2</b>  | <b>IKAROS cloning primer- Reverse</b> | GATCGGATCCTTAGCTCATGTGGAAGCGGTGCTCCCCTCGCG                                   |
| <b>3</b>  | <b>IKAROS-FLAG-Reverse</b>            | GATCGGATCCCTACTACTTGTGCATCGTCGCTCTTGTAAATCGCTCATGT<br>GGAAGCGGTGCTCCCCTCGCG  |
| <b>4</b>  | <b>IKAROS-myc-Revers</b>              | GATCGGATCCCTACAGATCTTCTTCAGAAATAAGTTTTTGTTCGCTCA<br>TGTGGAAGCGGTGCTCCCCTCGCG |
| <b>5</b>  | <b>R143W mutation-Forward</b>         | GAAGCCACACTGGAGAATGGCCCTTCCAGTGCAATC                                         |
| <b>6</b>  | <b>R143W mutation-Reverse</b>         | CTTCGGTGTGACCTTTACCGGGAAGGTCACGTTAG                                          |
| <b>7</b>  | <b>M494V mutation-Forward</b>         | ATCCTTTTGAGTGCAACGTGTGCGGCTACCACAGCCAG                                       |
| <b>8</b>  | <b>M494V mutation-Reverse</b>         | CTGGCTGTGGTAGCCGCACACGTTGCACTCAAAGGAT                                        |
| <b>9</b>  | <b>C150R mutation-Forward</b>         | TTCCAGTGCAATCAGCGCGGGCCTCATTACC                                              |
| <b>10</b> | <b>C150R mutation-Reverse</b>         | GGTGAATGAGGCCCGCGCTGATTGCACTGGAA                                             |
| <b>11</b> | <b>A448R mutation-Forward</b>         | ACTCGCAGGACAGGCTCCGCGTGGTCAGC                                                |
| <b>12</b> | <b>A448R mutation-Reverse</b>         | GCTGACCACGCGGAGCCTGTCCTGCGAGT                                                |
| <b>13</b> | <b>K286* G mutation-Forward</b>       | GATCAAGCTTCAGCCACCATGGATGCTGATGAGGGTCAAGAC                                   |
| <b>14</b> | <b>K286* G mutation-Reverse</b>       | GATCGGATCCCTAGTCCCAAGAAATTTCTGAGGCATAGAGC                                    |
| <b>15</b> | <b>G337S mutation-Forward</b>         | GTGCAGACGCCCCGGGCAGTTCCGAGGTGGTCCCGG                                         |
| <b>16</b> | <b>G337S mutation-Reverse</b>         | CCGGGACCACCTCGGAAGTCCCCGGGGCGTCTGCAC                                         |
| <b>17</b> | <b>R162Q- Cloning primer-Forward</b>  | AGGGCAACCTGCTCCAGCACATCAAGCTGCATTC                                           |
| <b>18</b> | <b>R162Q- Cloning primer-Reverse</b>  | TCCCGTTGGACGAGGTCGTGTAGTTTCGACGTAAG                                          |
| <b>19</b> | <b>TRAIL cloning primer- Forward</b>  | GATCAAGCTTCCATGGCTATGATGGAGGTCC                                              |
| <b>20</b> | <b>TRAIL cloning primer- Reverse</b>  | GATCTCTAGATTAGCCAACTAAAAAGGC                                                 |
| <b>21</b> | <b>Q27K TRAIL -Forward</b>            | GATCTTCACAGTGCTCCTGAAGTCTCTCTGTGTGG                                          |
| <b>22</b> | <b>Q27K TRAIL -Reverse</b>            | CCACACAGAGAGACTTCAGGAGCACTGTGAAGATC                                          |
